# Supplementary material
Source: PubMed Central journal article supplement (PMC7174048)
Supplement: awaa058_supplementary_data.pdf [file awaa058_supplementary_data.pdf]

**Supplementary Material:**  
Supplementary Table S1  
Supplementary Figure S1-S3

| <i>Cluster size</i>           | <i>P<sub>FWE-corr</sub></i> | <i>P<sub>FDR-corr</sub></i> | <i>T</i>     | <i>P<sub>uncorr</sub></i> | <i>x</i>  | <i>y</i>   | <i>z</i>   |
|-------------------------------|-----------------------------|-----------------------------|--------------|---------------------------|-----------|------------|------------|
| <i>ADNI-1 AD vs Controls</i>  |                             |                             |              |                           |           |            |            |
| 71783                         | <b>0.0001</b>               | <b>0.0004</b>               | <b>12.14</b> | <b>0.0001</b>             | <b>46</b> | <b>-12</b> | <b>-24</b> |
|                               | 0.0001                      | 0.0004                      | 11.62        | 0.0001                    | 36        | -16        | -20        |
|                               | 0.0001                      | 0.0004                      | 11.55        | 0.0001                    | -40       | -18        | -24        |
| 72                            | <b>0.0001</b>               | <b>0.0004</b>               | <b>7.11</b>  | <b>0.0001</b>             | <b>28</b> | <b>-22</b> | <b>38</b>  |
| 52                            | <b>0.0001</b>               | <b>0.0004</b>               | <b>6.94</b>  | <b>0.0001</b>             | -6        | -2         | 28         |
| <i>ADNI-2 AD vs. Controls</i> |                             |                             |              |                           |           |            |            |
| 60265                         | <b>0.0001</b>               | <b>0.0005</b>               | <b>10.73</b> | <b>0.0001</b>             | <b>44</b> | <b>-12</b> | <b>-24</b> |
|                               | 0.0001                      | 0.0005                      | 10.20        | 0.0001                    | -40       | -18        | -24        |
|                               | 0.0001                      | 0.0005                      | 9.63         | 0.0001                    | -34       | -20        | -30        |
| 69                            | <b>0.0001</b>               | <b>0.0005</b>               | <b>6.32</b>  | <b>0.0001</b>             | <b>-6</b> | <b>0</b>   | <b>28</b>  |

**Table S1: AD Atrophy Network Mapping Results.** Peak voxel coordinates and T-values for local maxima are reported for results surviving a voxel-wide family-wise error corrected  $p < 0.05$  using permutation testing for clusters  $> 10$  voxels.

| <i>Cluster size</i>             | <i>T</i> | <i>x</i>   | <i>y</i>   | <i>z</i>  |
|---------------------------------|----------|------------|------------|-----------|
| <i>AVLT Delayed Recognition</i> |          |            |            |           |
| 67                              | 4.59     | <b>-18</b> | <b>-34</b> | <b>-2</b> |
| 60                              | 4.57     | 34         | -42        | -2        |
| 42                              | 4.25     | -36        | -22        | -20       |
| <i>AVLT Delayed Recall</i>      |          |            |            |           |
| 3121                            | 5.11     | -12        | -22        | -8        |
| 634                             | 4.52     | 32         | -6         | -20       |
| 159                             | 5.10     | -20        | -40        | 6         |
| 111                             | 5.22     | <b>28</b>  | <b>-40</b> | <b>6</b>  |
| 33                              | 4.77     | 12         | -58        | -42       |
| 14                              | 5.11     | -8         | -26        | 4         |
| <i>Delusions</i>                |          |            |            |           |
| 3528                            | 5.85     | <b>12</b>  | <b>20</b>  | <b>68</b> |
| 1257                            | 5.64     | 38         | 24         | -14       |
| 1214                            | 5.41     | 18         | 10         | 18        |
| 500                             | 5.27     | -24        | 52         | 32        |
| 460                             | 5.83     | -52        | -62        | -28       |
| 294                             | 5.43     | -30        | 52         | -12       |
| 282                             | 5.26     | -32        | 22         | -12       |
| 69                              | 4.55     | 66         | -48        | 38        |
| 66                              | 5.15     | 56         | -54        | -30       |
| 23                              | 4.58     | 42         | -56        | -28       |
| 19                              | 4.31     | -14        | 14         | 68        |
| 10                              | 4.22     | -2         | 24         | 18        |

**Table S2: Symptom Atrophy Network Mapping Results.** Peak voxel coordinates and T-values for local maxima are reported for results surviving a voxel-wide family-wise error corrected  $p < 0.05$  using permutation testing for clusters  $> 10$  voxels. Coordinates in bold were used to generate ROIs.

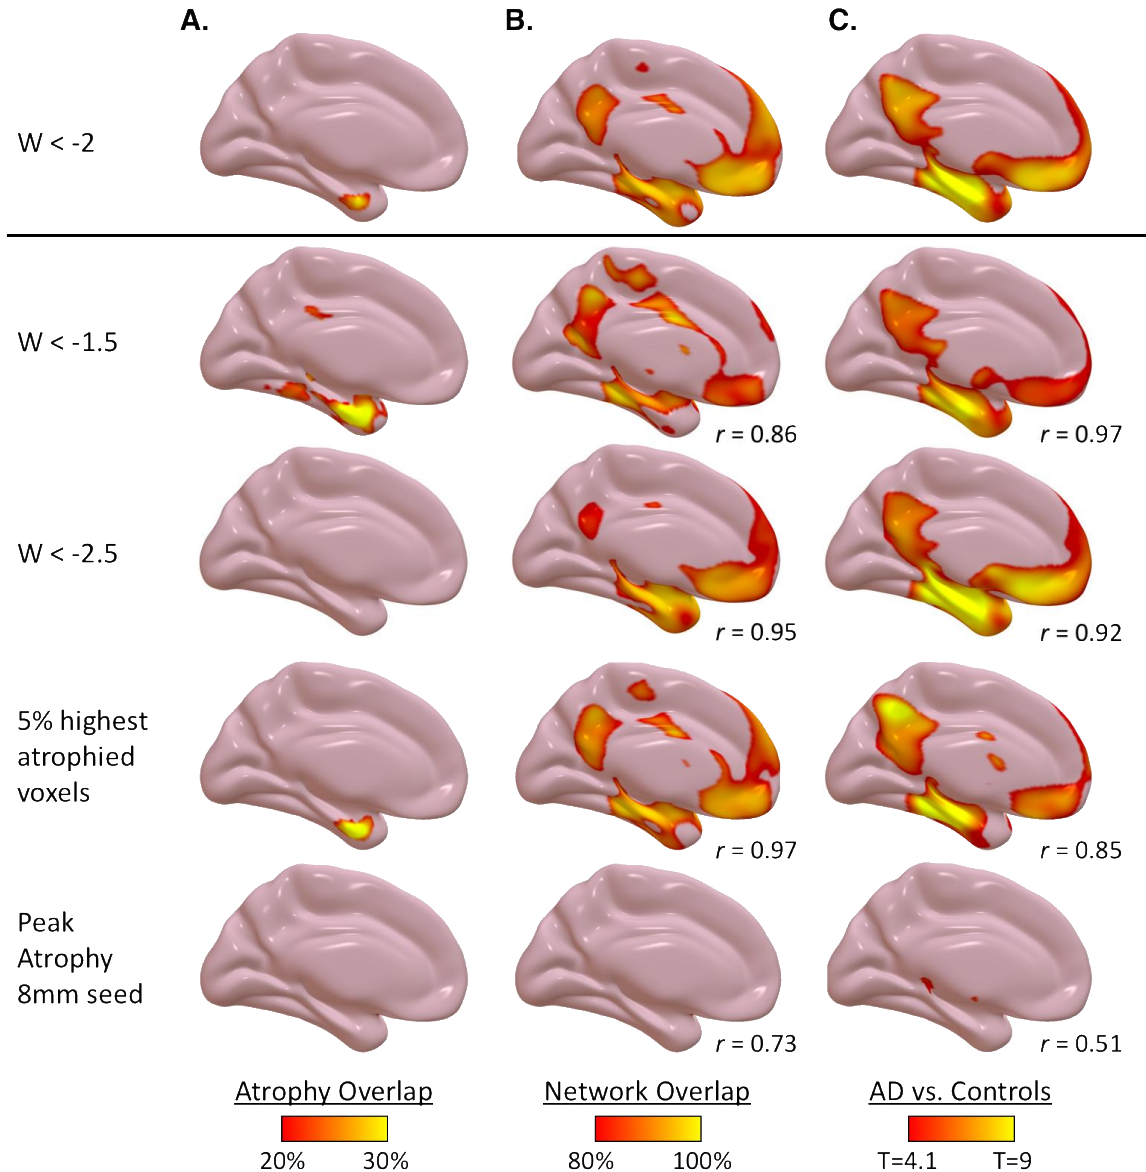

**Fig. S1: Atrophy Network Mapping Control Analyses.** While the percentage of patients with atrophy in the same location increases with more stringent threshold (A), overlap of atrophy network maps (B) and comparison to control subjects (C) remains unchanged. Controlling for seed size by thresholding atrophy to the same total size (highest 5% of voxels) resulted in similar findings. In contrast, use of peak atrophy seeds resulted in less robust results vs. using distributed atrophy seeds (bottom). Spatial correlations with reference to results generated using a threshold of  $w < -2$  are reported.

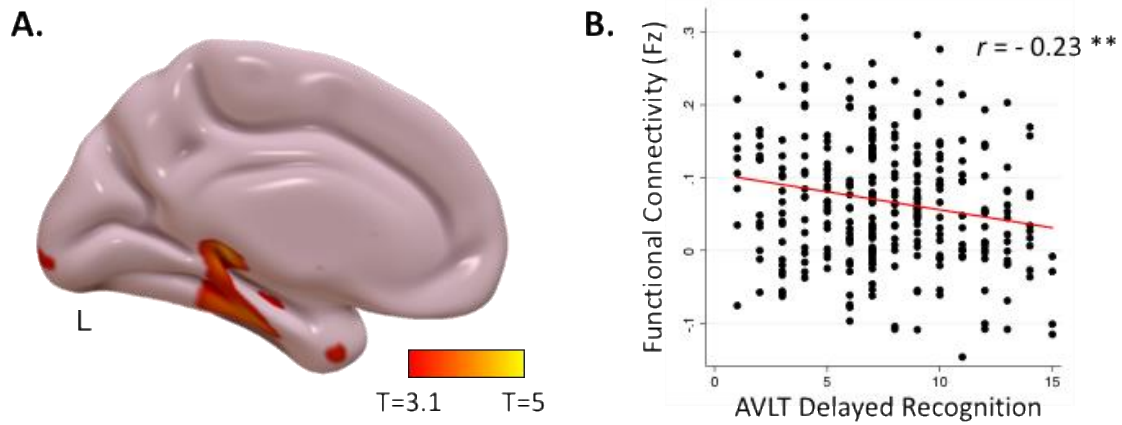

**Fig. S2: Atrophy network mapping of Memory delayed recognition.** (A) Voxel-wide regression analysis comparing functional connectivity strength of single-subject atrophy maps and AVLT delayed recognition scores. (B) Scatter-plot showing relationship between functional connectivity strength to the peak atrophy network mapping result and delayed recognition scores.

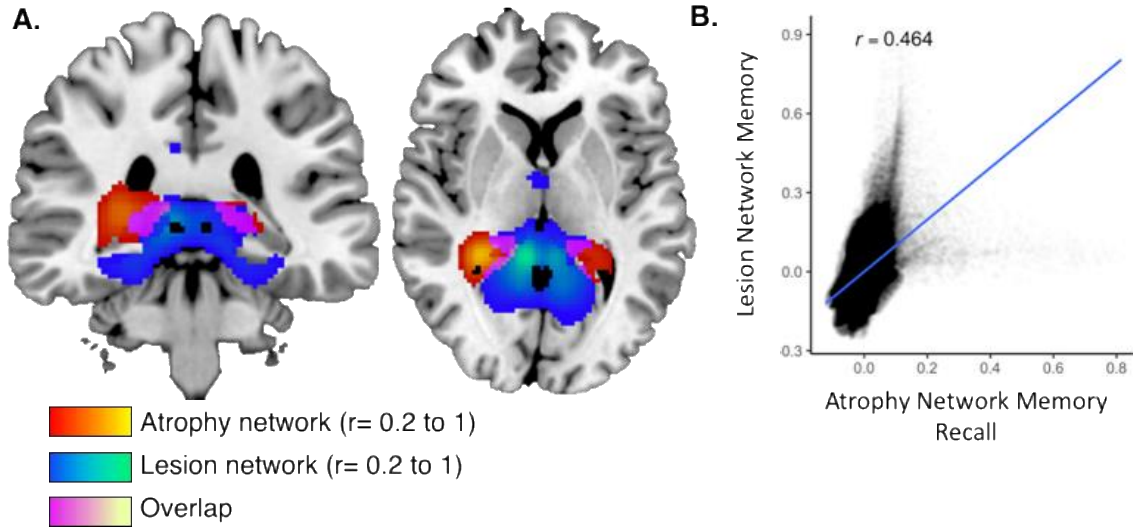

**Fig. S3: Comparing lesion network mapping for memory with atrophy network mapping for memory delayed recall.**
